## Anderson-Fabry disease: beyond what "eyes can see"

Ferreira A.<sup>1</sup>; Azevedo O.<sup>2</sup>; Bettencourt N.<sup>3</sup>

<sup>1</sup>Faculdade de Ciências da Saúde UBI, Covilhã, Portugal

<sup>2</sup>Hospital da Senhora da Oliveira, Guimarães, Portugal

<sup>3</sup>Faculty of Medicine University of Porto, Porto, Portugal

**Introduction:** cardiac magnetic resonance (CMR) plays a major role in the assessment of cardiac involvement in Anderson-Fabry (ADF) disease and in subsequent therapeutic decisions.

CMR feature tracking (CMR-FT) allows a fast and accurate assessment of strain analysis avoiding the need of additional sequences.

**Purpose:** assess the utility of CMR-FT in the evaluation of the cardiac involvement by AFD.

**Methods:** included seventy-six consecutive genetically proven ADF patients, from a single reference center, and thirty-nine controls (matching for age and sex). The participants provided written informed consent. CMR-FT was performed by a level III operator using a dedicated software.

**Results:** Globally, AFD patients had worse strain results (table 1). But even patients both without left ventricle hypertrophy and without presence of late gadolinium enhancement (52.6%) had worse results when comparing to controls (values not presented). In this particular sub-group, parameters with higher area under the curve (AUC) were longitudinal strain rate ( $p < 0.001$ ; AUC 0.84; cut-off value of -0.93%, sensibility 85%, specificity 70%) and circumferential strain rate ( $p < 0.001$ ; AUC 0.88; cut-off -1.00%, sensibility 85%, specificity 70%).

**Conclusion:** even in very initial stages, strain is already affected in AFD. CMR-FT can provide additional data without lengthening a CMR study.

table 1: main CMR results

| Parameters                                      | AFD           | Controls      | p value |
|-------------------------------------------------|---------------|---------------|---------|
| LV ejection fraction (%)                        | 62.38 ± 6.51  | 64.18 ± 5.93  | 0.122   |
| LV 2D strain analysis - peak strain, global (%) |               |               |         |
| - radial                                        | 39.44 ± 8.69  | 48.64 ± 11.28 | 0.000   |
| - circumferential                               | -19.52 ± 3.16 | -22.23 ± 2.54 | 0.000   |
| - longitudinal                                  | -17.41 ± 3.70 | -19.63 ± 2.03 | 0.000   |
| Radial strain rate                              | 1.82 ± 0.65   | 2.92 ± 1.05   | 0.000   |
| Circumferential strain rate (%)                 | -0.84 ± 0.23  | -1.23 ± 0.32  | 0.000   |
| Longitudinal strain rate (%)                    | -0.74 ± 0.17  | -1.04 ± 0.20  | 0.000   |
| LV 3D strain analysis -peak strain, global (%)  |               |               |         |
| - radial                                        | 29.16 ± 8.55  | 33.85 ± 9.67  | 0.003   |
| - circumferential                               | -15.24 ± 2.66 | -16.86 ± 2.07 | 0.000   |
| - longitudinal                                  | -14.23 ± 2.49 | -15.82 ± 1.51 | 0.000   |
| RV peak strain, global circumferential (%)      | -12.58 ± 3.20 | -14.86 ± 3.83 | 0.001   |
| RV peak strain, longitudinal (%)                | -26.31 ± 4.21 | -27.64 ± 2.86 | 0.071   |

LV - left ventricle RV- right ventricle 2D - two-dimensional 3D - three-dimensional
